# Supplementary material for: Plant–Soil Feedback Effects on Growth, Defense and Susceptibility to a Soil-Borne Disease in a Cut Flower Crop: Species and Functional Group Effects
Source: PubMed Central journal article supplement (PMC5742127; doi:10.3389/fpls.2017.02127), 2017-12-19
Supplement: Image_3.pdf [file Image_3.pdf]

## Supplementary Material

# Plant-soil feedback effects on growth, defense and susceptibility to a soil-borne disease in cut flower crop: species and functional group effects

Hai-kun Ma\*, Ana Pineda, Andre W.G. van der Wurff, Ciska Raaijmakers, T. Martijn Bezemer

\* Correspondence: Corresponding Author: [H.Ma@nioo.knaw.nl](mailto:H.Ma@nioo.knaw.nl)

### Supplementary Figures

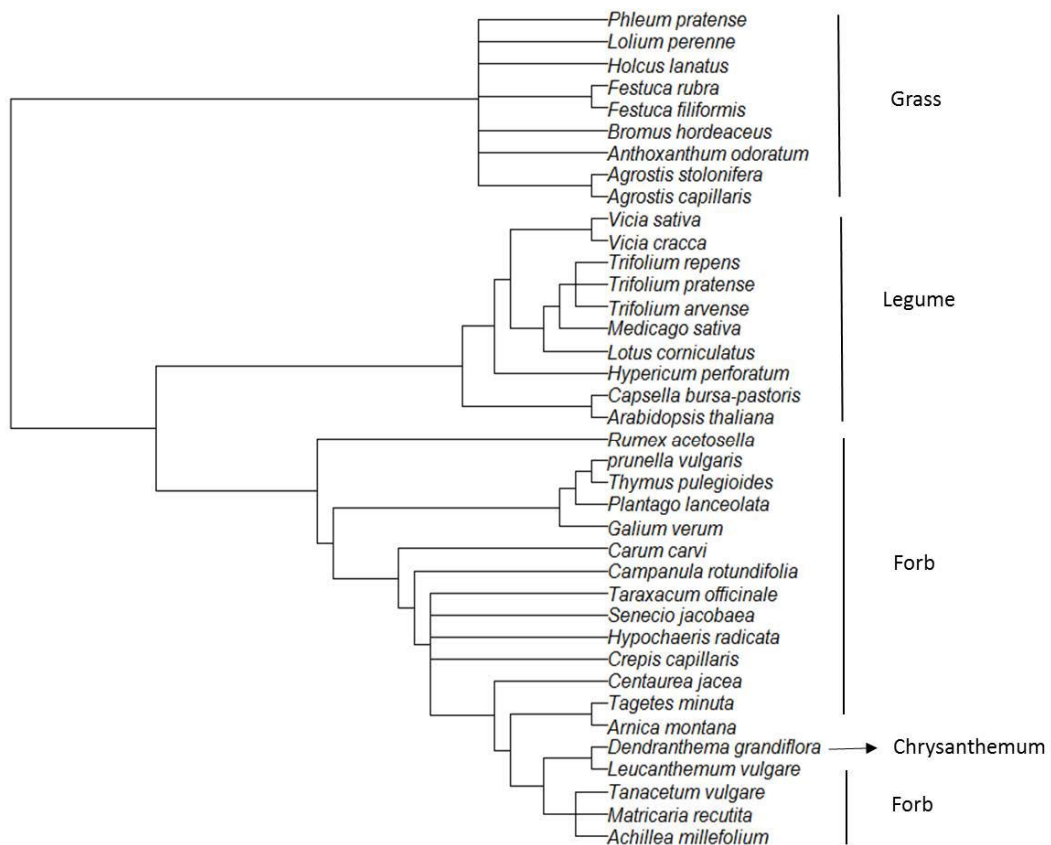

**Supplementary Figure 3.** Phylogenetic relationships between conditioned plant species and chrysanthemum. Topology from Phylomatic program (Webb & Donoghue 2005).
